# Supplementary material
Source: HighWire-hosted journal article supplement (http://thorax.bmjjournals.com/highwire/filestream/174168/field_highwire_adjunct_files/1/Supplemental_Figure_E1.pdf)

Figure E1

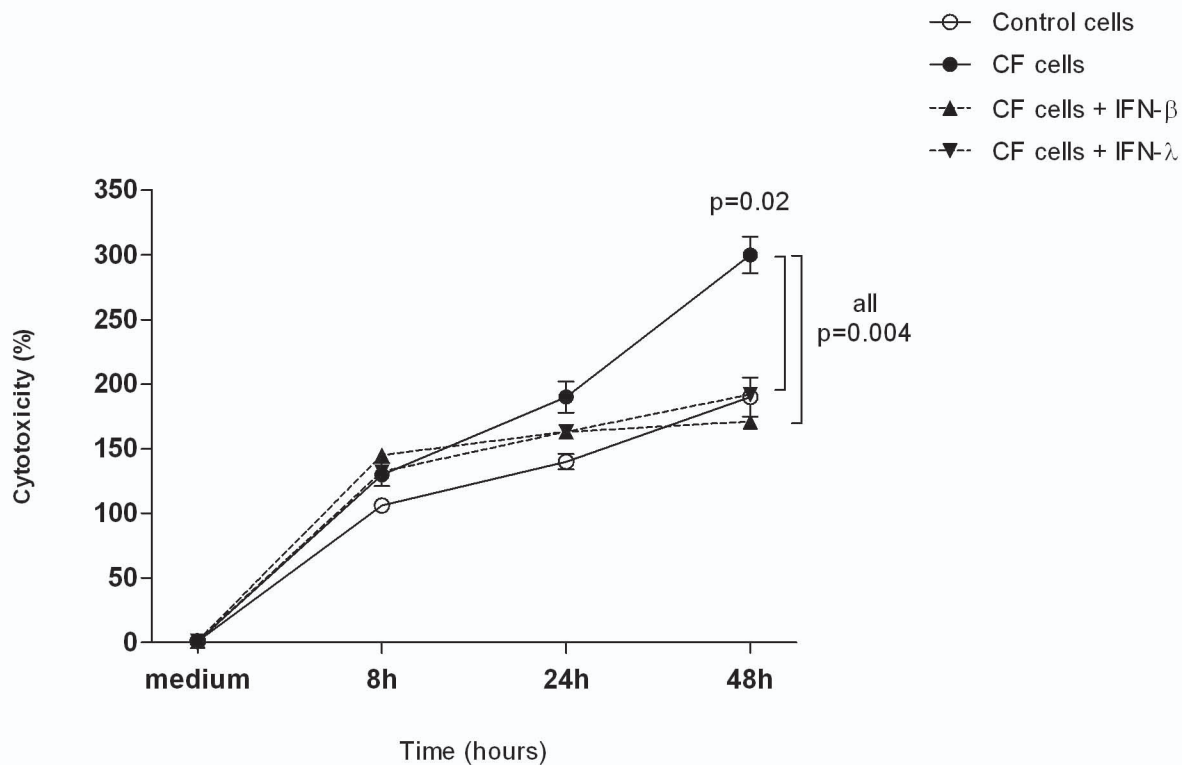

Supplement: Supplemental_Figure_E1.pdf [file Supplemental_Figure_E1.pdf]
